# Supplementary material
Source: HighWire-hosted journal article supplement (https://ijssurgery.com/content/8693)
Supplement: inline-supplementary-material-2 [file inline-supplementary-material-2.docx]

**Supplemental Table 1.** Postoperative patient outcomes for groups stratified by age and procedure type.

| **Patient Characteristics** | **< 70 Years Old + Discectomy**  (N = 82) | **≥ 70 Years Old + Discectomy**  (N = 8) | **< 70 Years Old + Decompression** (N = 43) | **≥ 70 Years Old + Decompression** (N = 31) | **p-valuea** | **q-valueb** |
| --- | --- | --- | --- | --- | --- | --- |
| **VAS Back Outcomes** |  |  |  |  |  |  |
| Preoperative, Median (IQR) | 6.0 (4.0 – 8.0) | 4.9 (2.2 – 7.2) | 6.5 (4.8 – 7.2) | 5.2 (3.5 – 6.6) | 0.315 | 0.450 |
| ΔDay 1, Median (IQR) | 1.6 (-0.5 – 4.5) | -0.1 (-2.6 – 3.5) | 0.5 (-0.9 – 2.5) | 1.5 (0 – 3.5) | 0.177 | 0.374 |
| ΔDay 4, Median (IQR) | 2.5 (0.5 – 4.8) | 3.6 (0.8 – 6.8) | 1.5 (-1.0 – 3.2) | 1.5 (-0.7 – 4.3) | 0.116 | 0.348 |
| Δ1 Week, Median (IQR) | 2.5 (0.5 – 5.2) | 2.5 (1.3 – 4.6) | 2.2 (0.5 – 3.6) | 2.5 (0 – 4.2) | 0.738 | 0.738 |
| Δ2 Week, Median (IQR) | 3.0 (1.0 – 5.6) | 3.2 (1.5 – 4.2) | 3.0 (0 – 4.2) | 2.0 (1.0 – 4.8) | 0.660 | 0.699 |
| Δ3 Month, Median (IQR) | 3.5 (0.9 – 6.0) | 2.2 (0 – 5.1) | 3.5 (1.0 – 5.6) | 2.4 (0.5 – 5.2) | 0.568 | 0.639 |
| **VAS Ipsilateral Leg Outcomes** |  |  |  |  |  |  |
| Preoperative, Median (IQR) | 6.8 (5.0 – 8.0) | 6.2 (3.8 – 8.0) | 5.5 (4.0 – 8.0) | 5.0 (2.0 – 8.0) | 0.208 | 0.374 |
| ΔDay 1, Median (IQR) | 4.0 (1.1 – 7.0) | 2.7 (-2.1 – 8.0) | 2.7 (0.5 – 4.9) | 3.0 (1.0 – 6.5) | 0.257 | 0.421 |
| ΔDay 4, Median (IQR) | 4.0 (1.5 – 6.4) | 5.8 (0 – 6.8) | 2.5 (1.4 – 4.3) | 2.5 (0 – 6.2) | 0.169 | 0.374 |
| Δ1 Week, Median (IQR) | 4.0 (1.5 – 6.2) | 3.8 (-0.6 – 8.0) | 3.0 (2.0 – 4.2) | 2.5 (0.7 – 6.5) | 0.469 | 0.563 |
| Δ2 Week, Median (IQR) | 4.0 (2.0 – 6.4) | 1.5 (-0.1 – 7.2) | 3.5 (2.0 – 5.0) | 2.6 (0 – 6.0) | 0.361 | 0.464 |
| Δ3 Month, Median (IQR) | 5.0 (3.0 – 7.4) | 5.2 (0 – 8.0) | 4.0 (2.0 – 5.6) | 3.0 (0 – 7.2) | 0.208 | 0.374 |
| **ODI Outcomes** |  |  |  |  |  |  |
| Preoperative, Median (IQR) | 21.7 (15.5 – 28.2) | 19.8 (17.0 – 23.1) | 19.5 (15.6 – 24.1) | 20.2 (14.8 – 24.6) | 0.325 | 0.450 |
| ΔDay 1, Median (IQR) | 2.0 (-6.2 – 10.3) | 1.3 (-2.9 – 7.6) | -4.0 (-10.5 – 1.1) | 1.0 (-5.5 – 5.0) | **0.016** | 0.144 |
| ΔDay 4, Median (IQR) | 2.0 (-4.6 – 10.1) | -1.2 (-3.7 – 9.5) | -3.0 (-9.4 – 2.7) | -2.5 (-9.5 – 6.0) | **0.016** | 0.144 |
| Δ1 Week, Median (IQR) | 4.0 (-2.8 – 12.4) | 6.2 (-2.8 – 13.7) | -1.5 (-7.7 – 5.4) | 1.0 (-5.0 – 6.1) | **0.028** | 0.168 |
| Δ2 Week, Median (IQR) | 7.1 (-0.3 – 13.8) | 4.8 (1.1 – 11.2) | 3.4 (-4.5 – 9.4) | 4.0 (-5.2 – 5.6) | 0.064 | 0.230 |
| Δ3 Month, Median (IQR) | 13.2 (7.6 – 19.1) | 9.1 (5.7 – 18.2) | 9.0 (3.7 – 14.1) | 7.5 (3.0 – 13.7) | 0.058 | 0.230 |
| ‘Δ’ Values are all reported as the median change in score from preoperative evaluation to the indicated follow-up timepoint. Positive values represent an improvement in score and negative values represent a decline.  aKruskal-Wallis test. bFalse discovery rate correction for multiple testing. | | | | | | | |
